# Supplementary material for: Effects of Dominance and Diversity on Productivity along Ellenberg's Experimental Water Table Gradients
Source: PubMed Central journal article supplement (PMC3440424; doi:10.1371/journal.pone.0043358), 2012-09-12

The photograph shows the western part of the basin in 1953, filled with loam. The view is upslope (towards north).

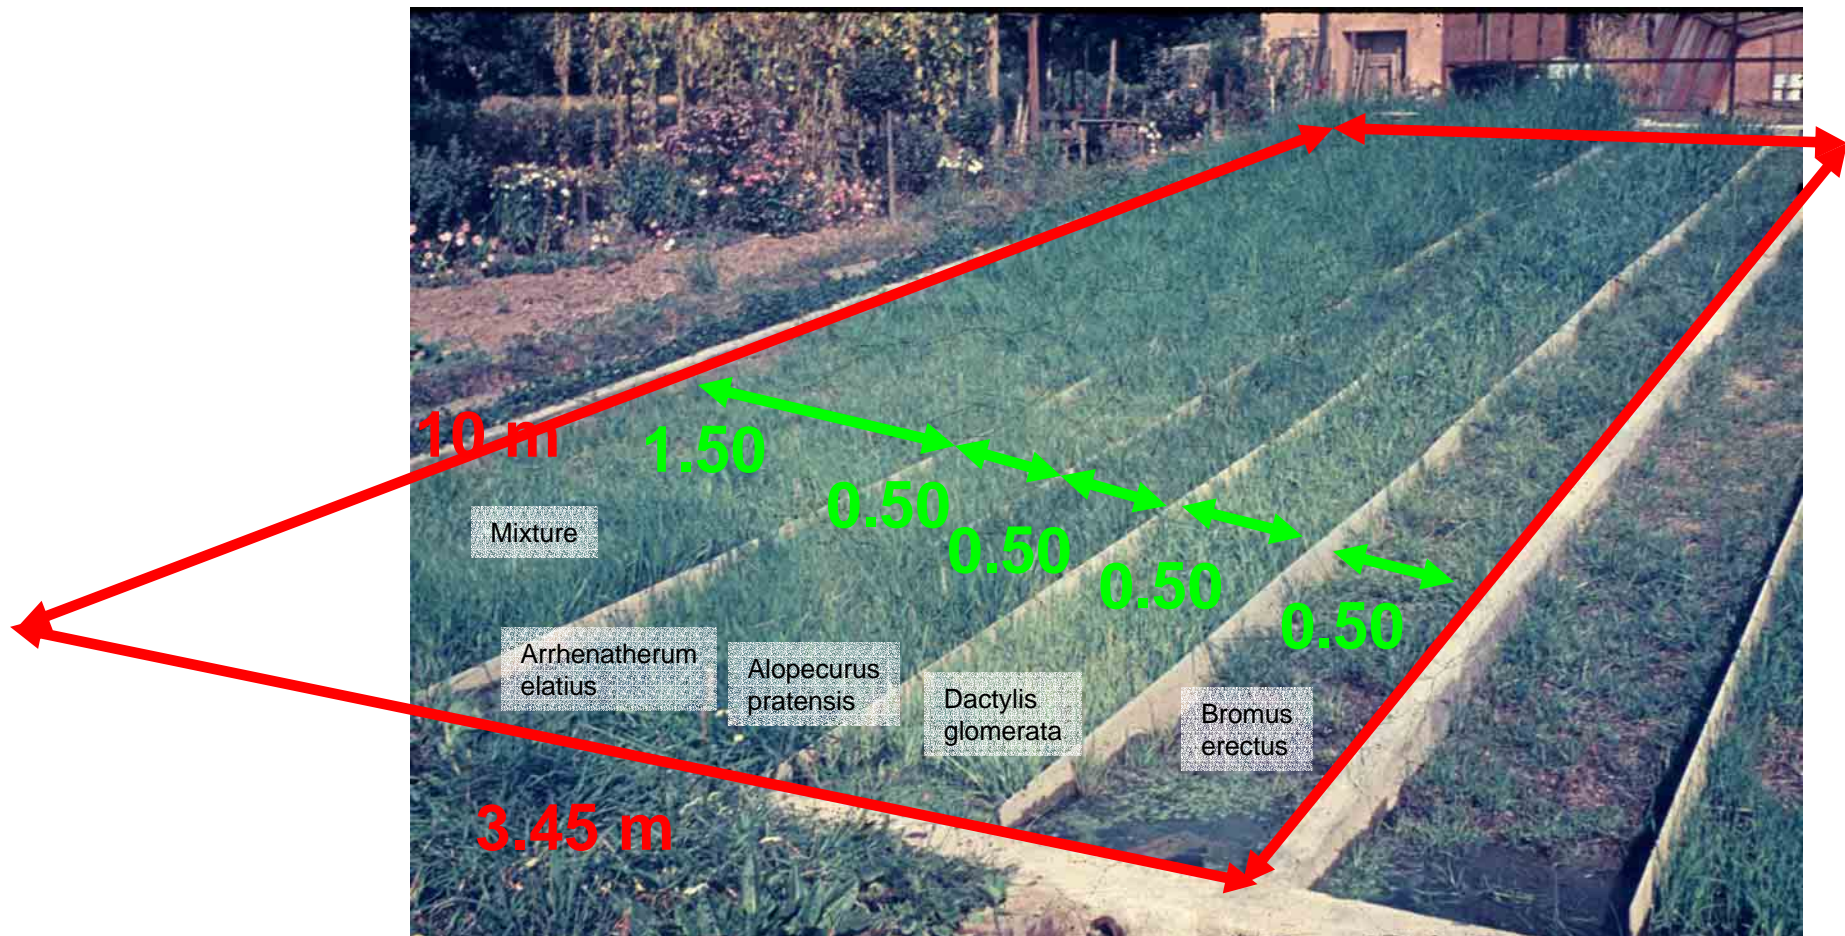

Hohenheim-Experiment-01.jpg



The photograph shows the western part of the basin in 1953, filled with loam. The section shows the wet part of the gradient.

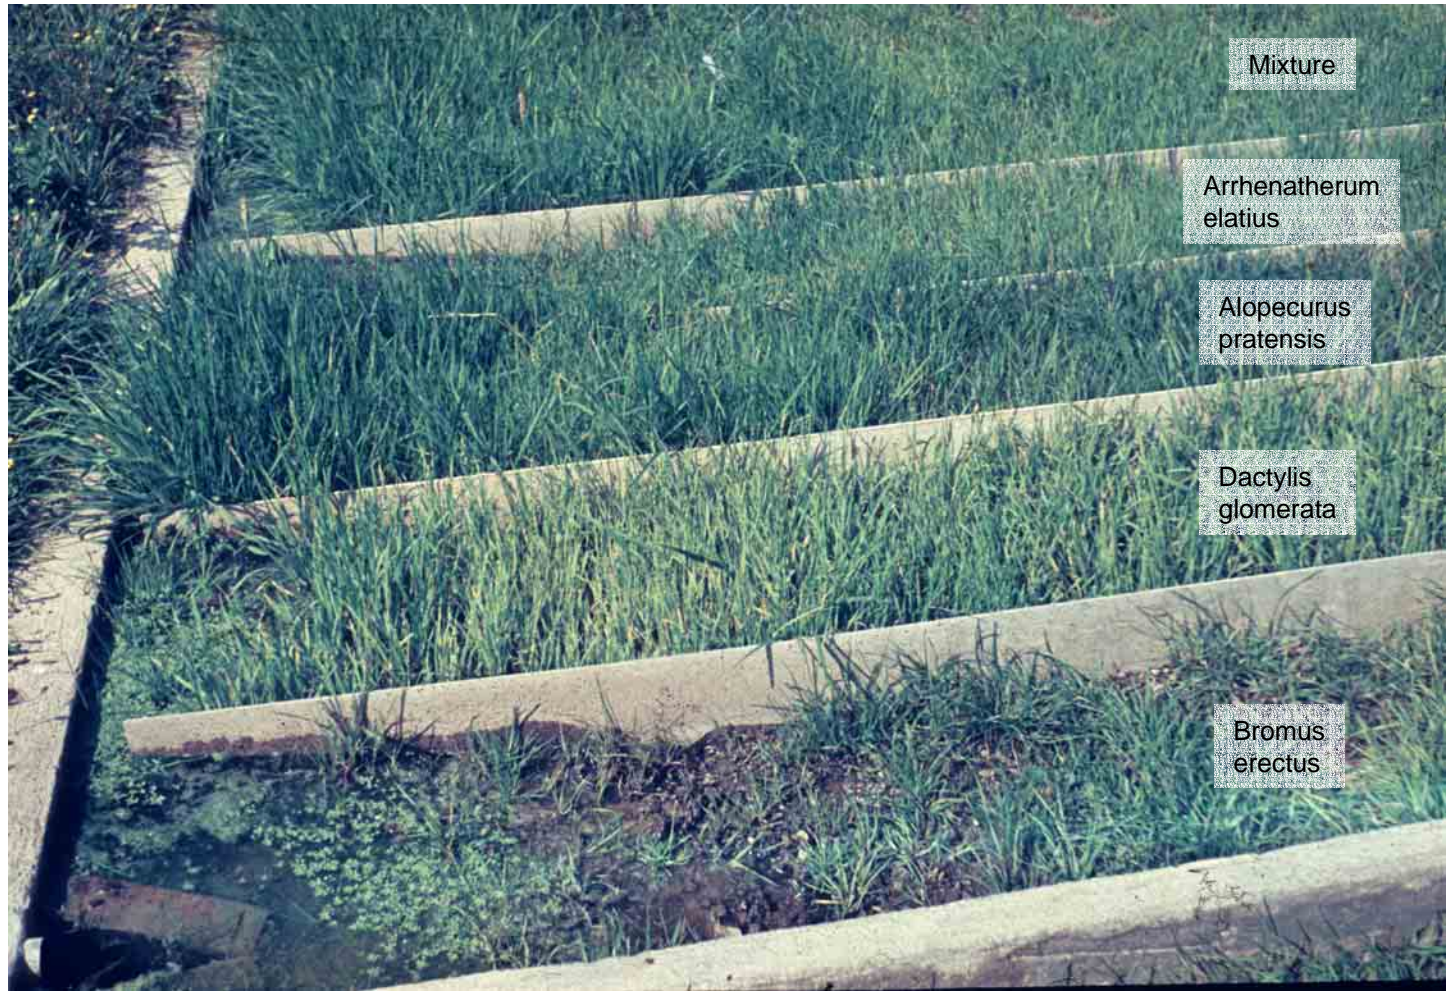

Hohenheim-Experiment-02.jpg



The photograph shows the western part of the basin in 1953, filled with loam. The section shows the dry part of the gradient.

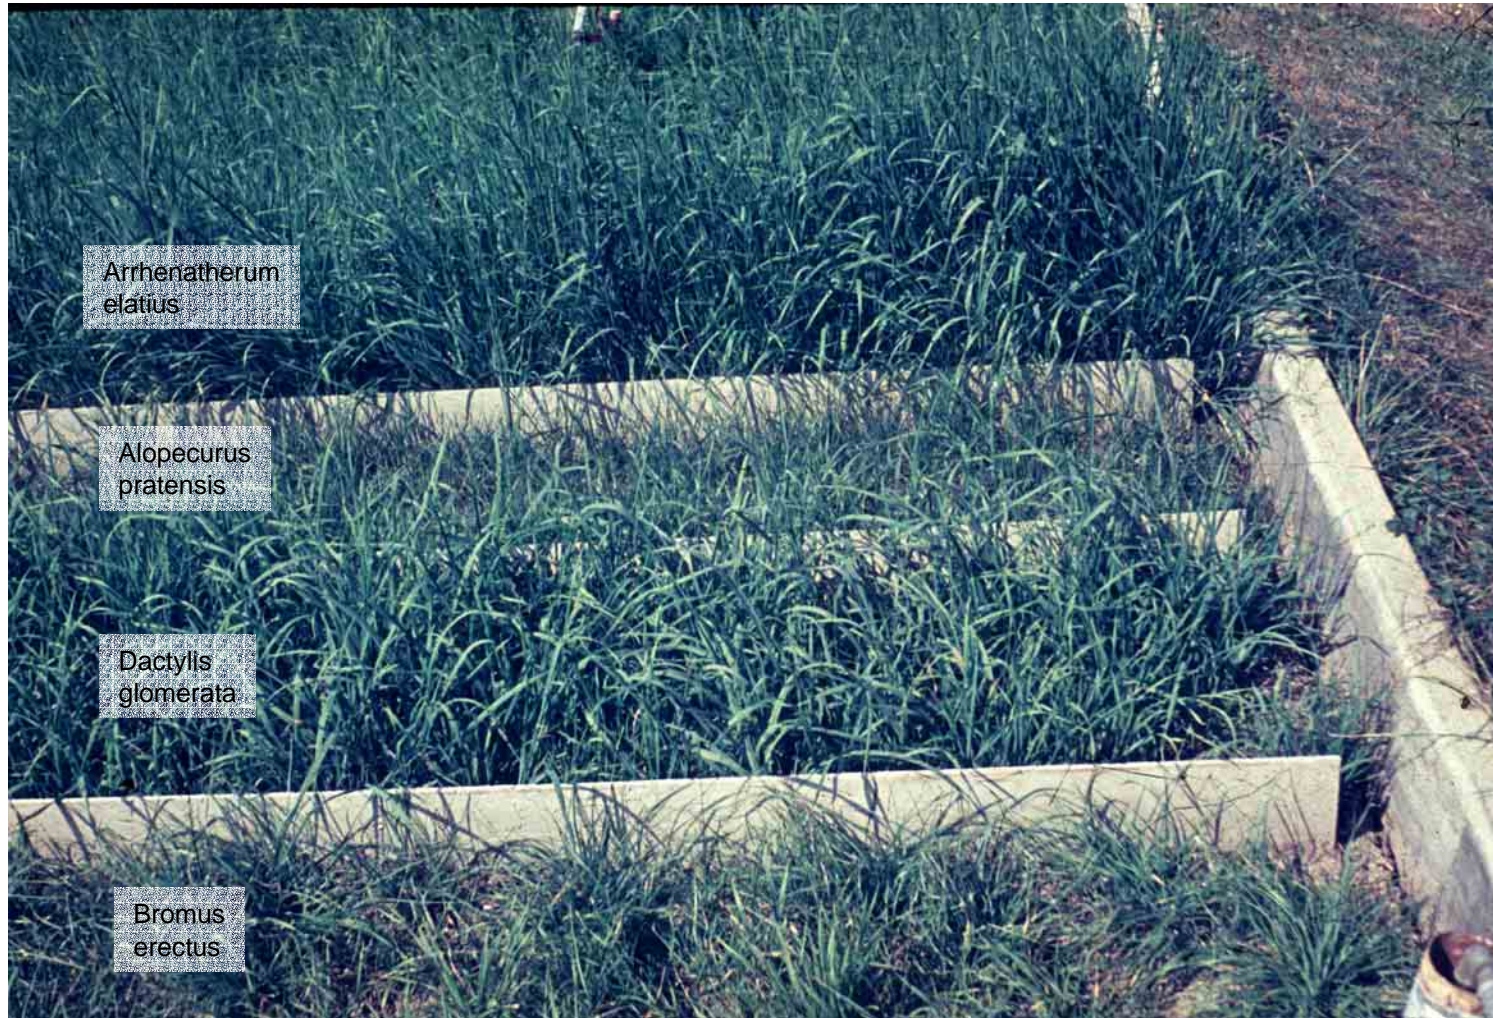

Hohenheim-Experiment-05.jpg



The photograph shows the basin in 1953.  
The view is downslope (towards south).

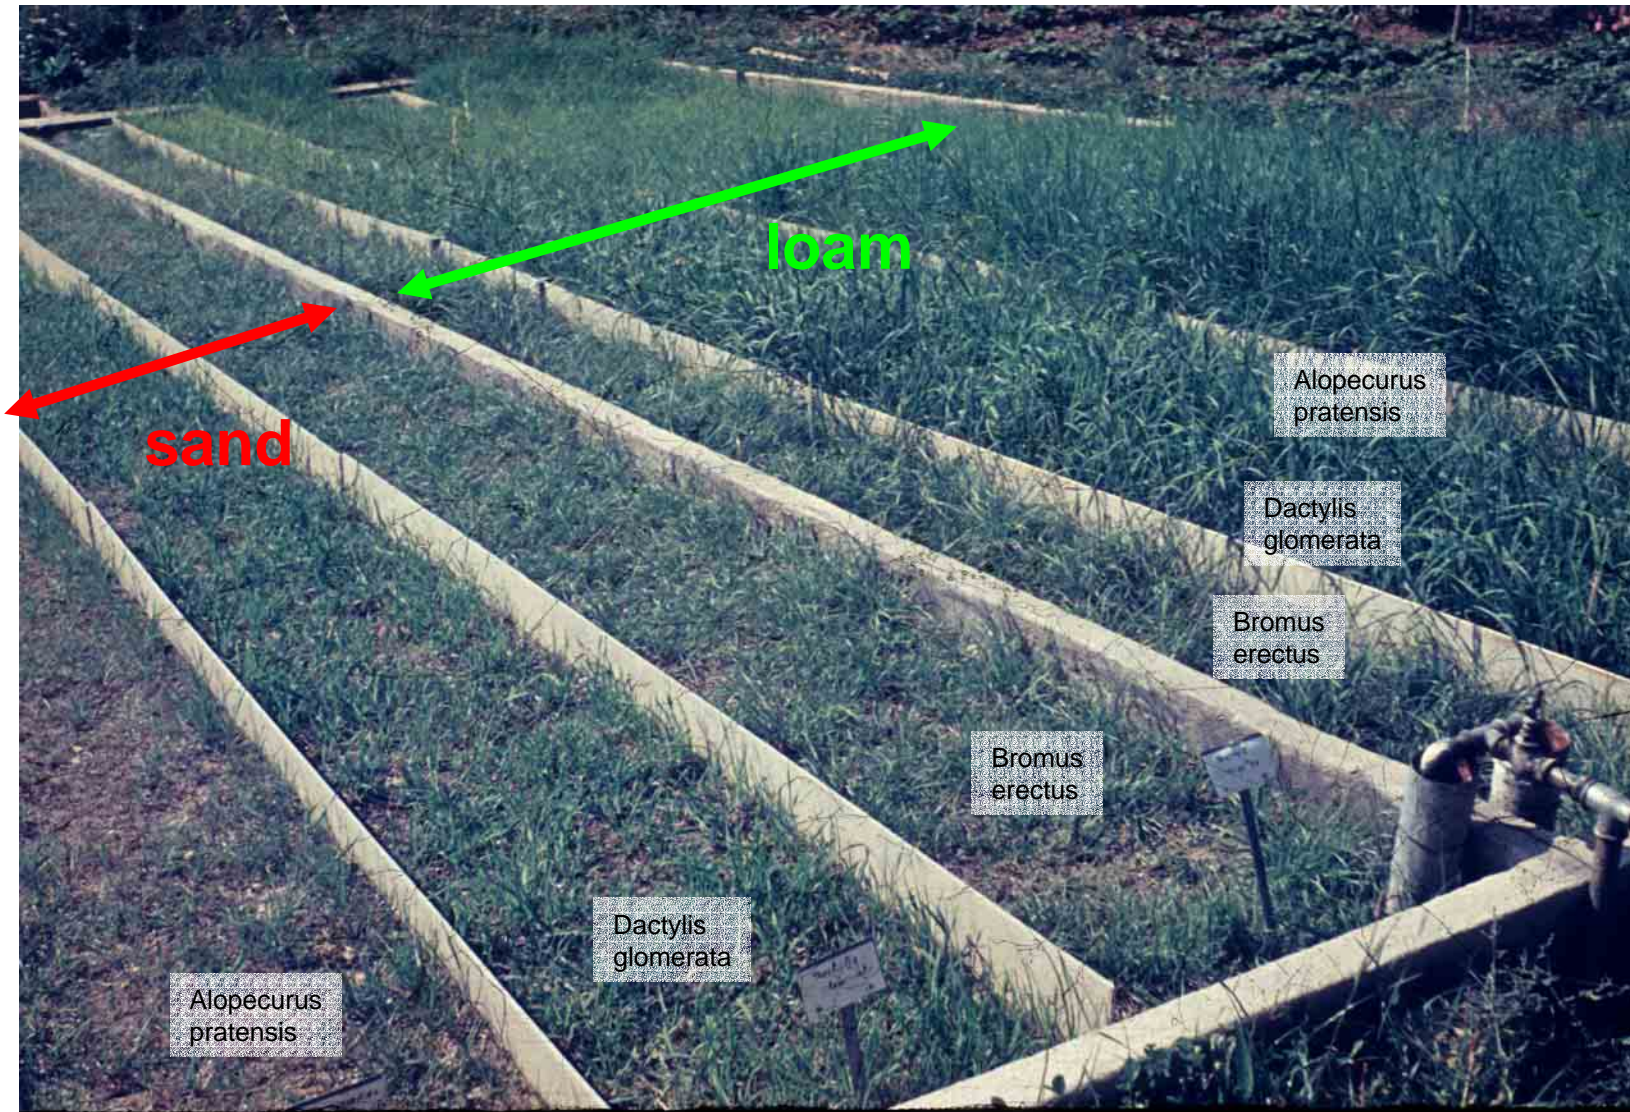

Hohenheim-Experiment-03.jpg



The photograph shows the western part of the basin in 1953, filled with loam. The section shows the wet part of the gradient.

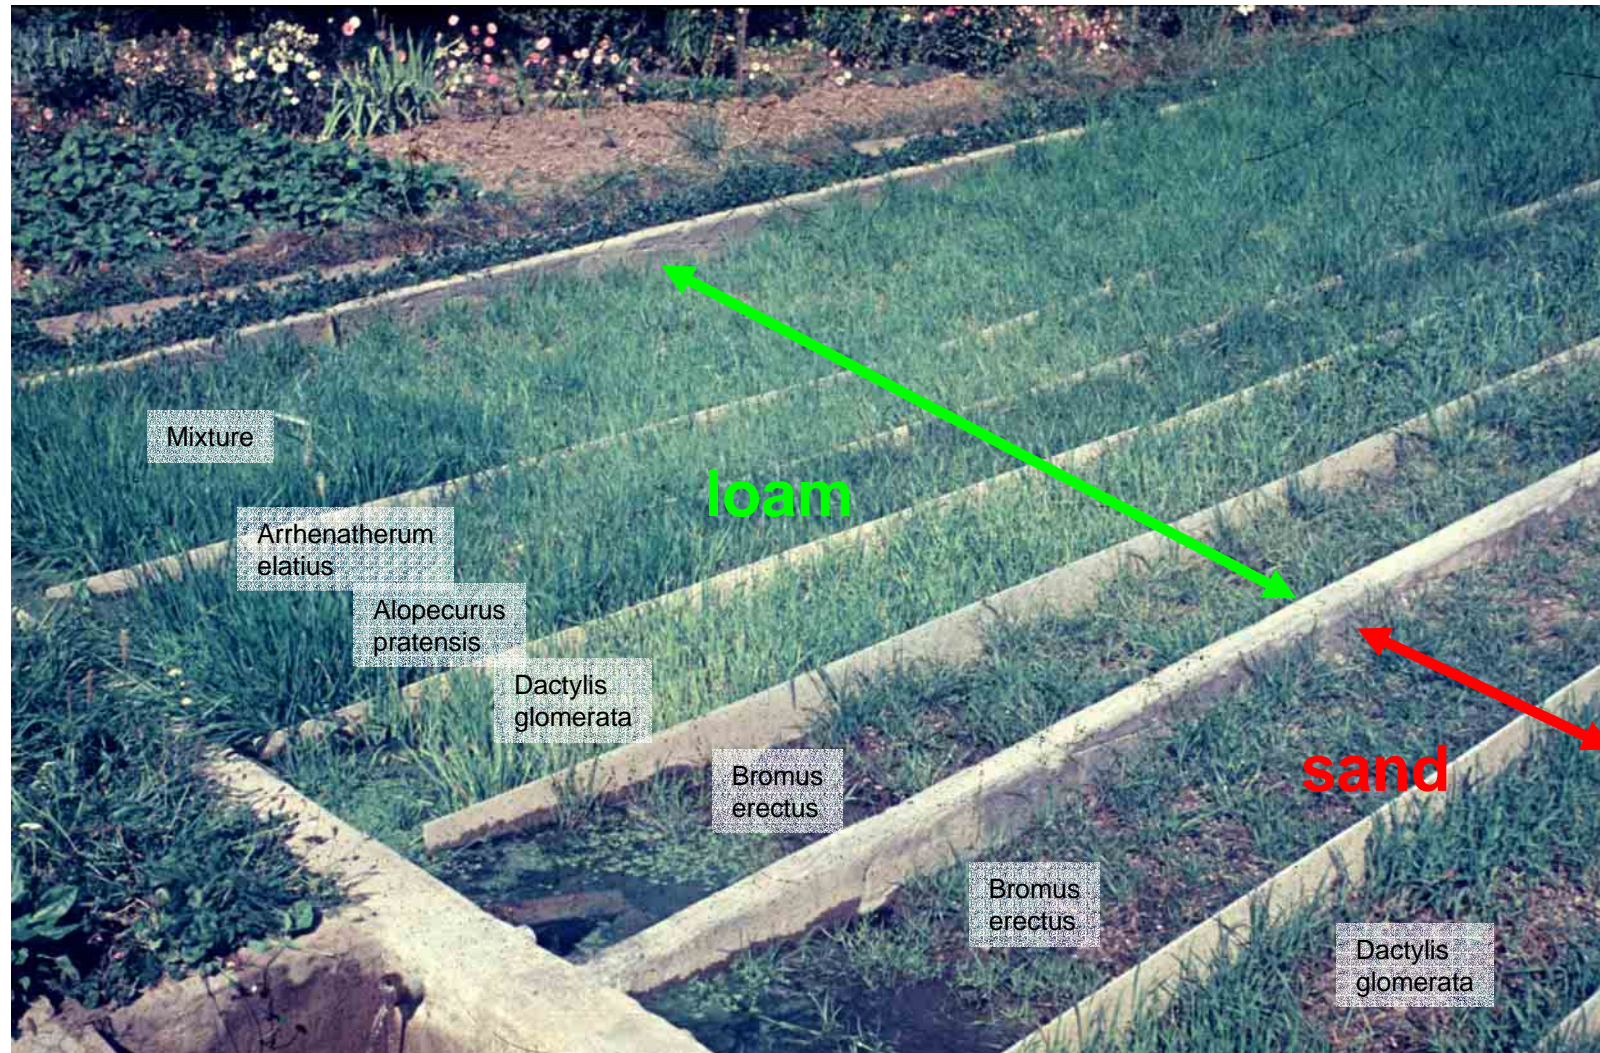

Hohenheim-Experiment-06.jpg



The photograph shows the western part of the basin in 1953, filled with loam. The view is upslope. The section shows the wet part of the gradient.

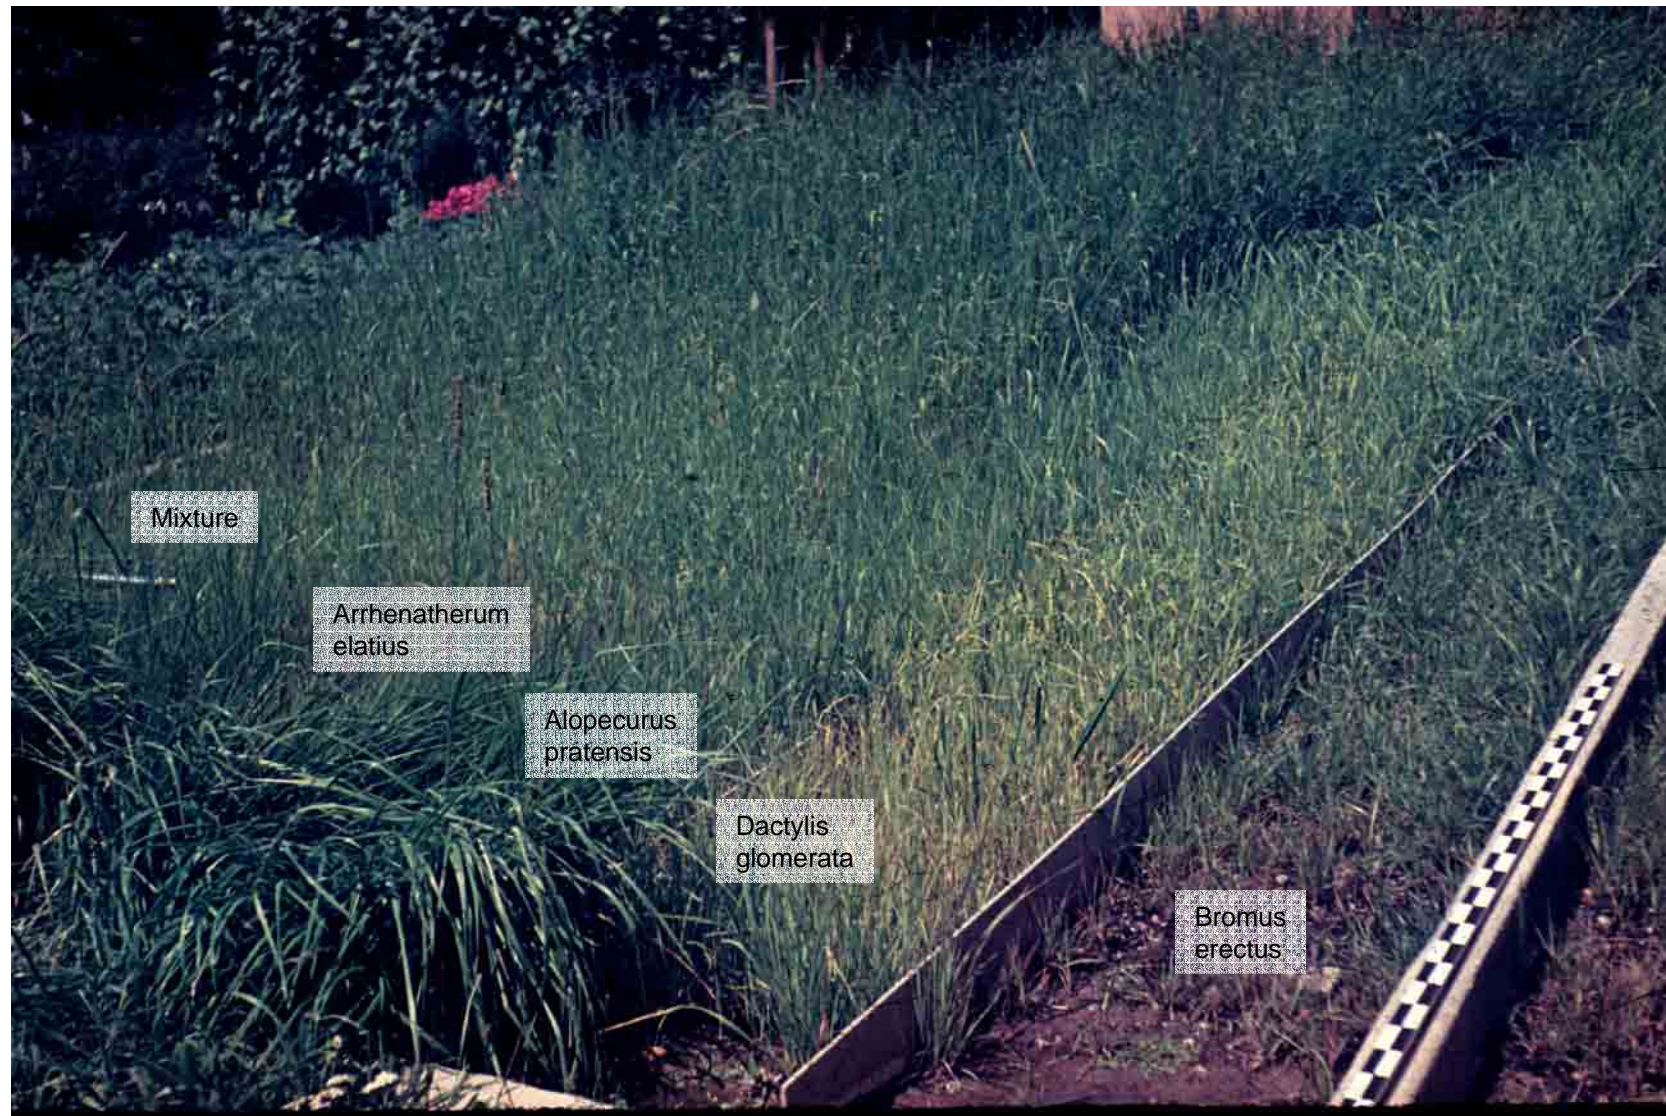

Hohenheim-Experiment-08.jpg



The photograph shows the eastern part of the basin in 1953, filled with sand. The view is upslope.

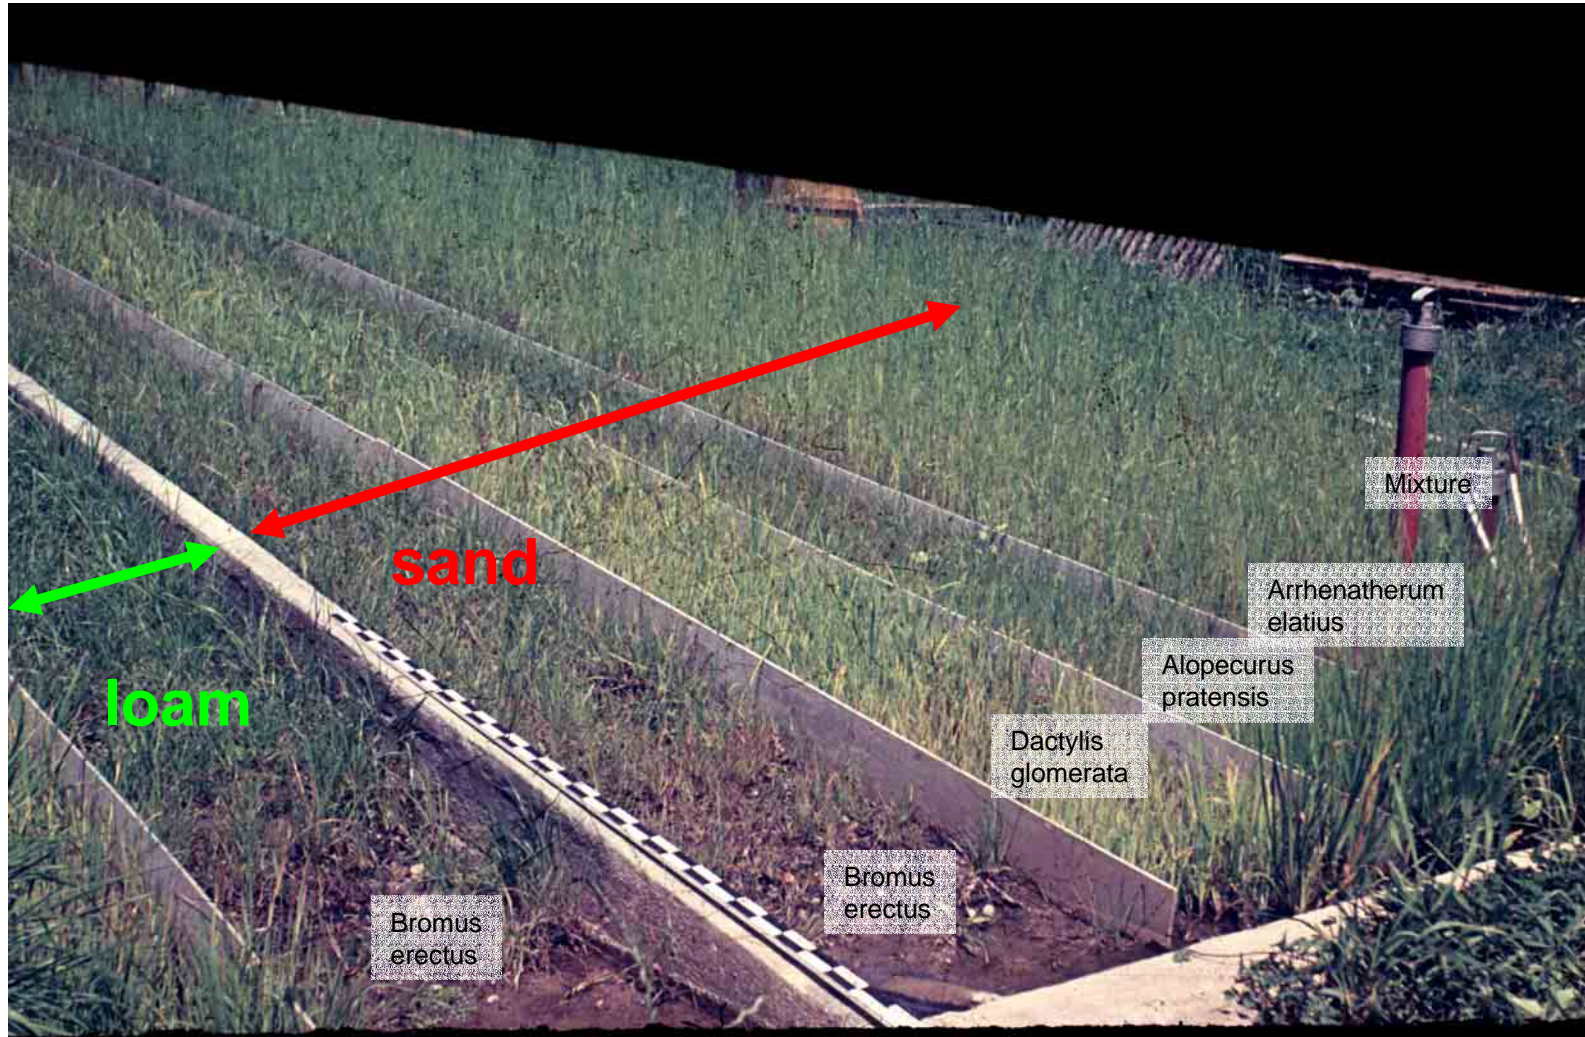

Hohenheim-Experiment-07.jpg



The photograph shows the western part of the basin in 1953, filled with loam. The section shows the wet part of the gradient.

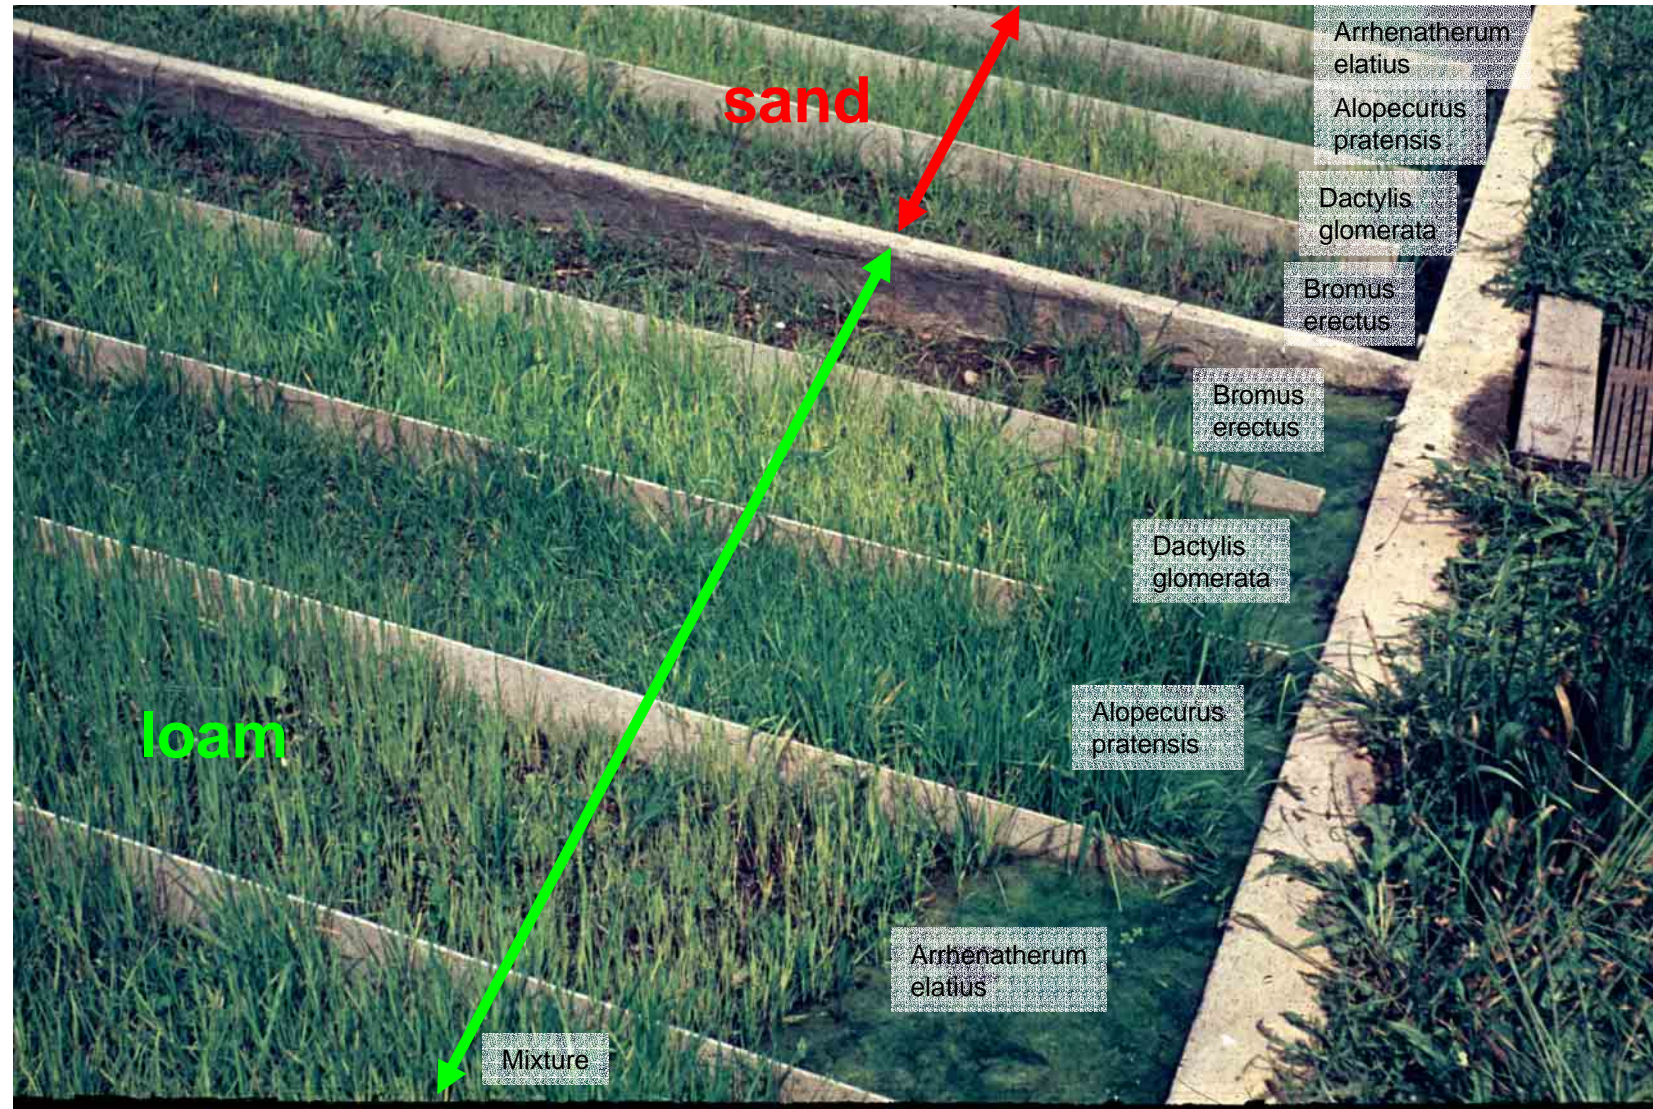

Hohenheim-Experiment-10.jpg



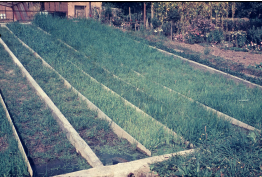



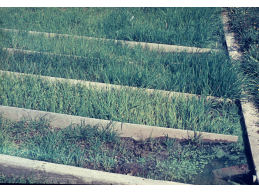



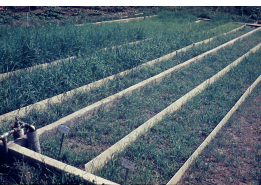



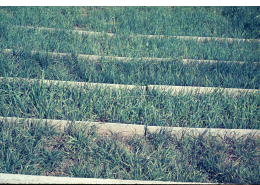



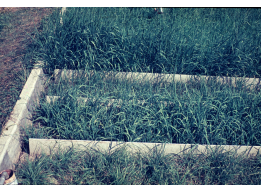

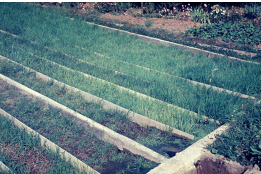



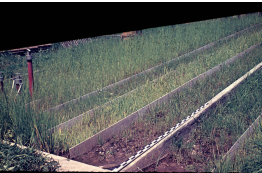

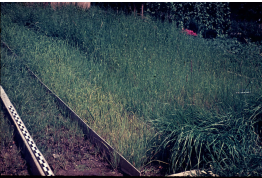



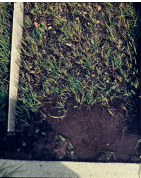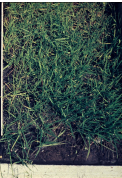

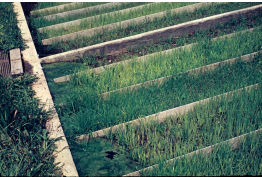



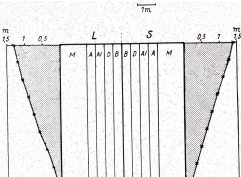

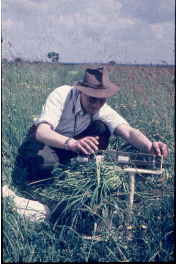



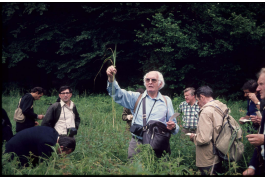

Supplement: pone.0043358.s002.pdf [file pone.0043358.s002.pdf]
